# Supplementary material for: Direct in situ ATR-IR spectroscopy of structural dynamics of NH4H2PO4 in aqueous solution
Source: Royal Society of Chemistry journal article supplement (doi:10.1039/c3ce41249k), 2013-01-01
Supplement: c3ce41249k.pdf [file c3ce41249k.pdf]

## Supporting Information

### **Direct In Situ ATR-IR Spectroscopy of Structural Dynamics of $\text{NH}_4\text{H}_2\text{PO}_4$ in Aqueous Solution**

Congting Sun, Dongli Xu, and Dongfeng Xue\*

*State Key Laboratory of Rare Earth Resource Utilization, Changchun Institute of Applied*

*Chemistry, Chinese Academy of Sciences, Changchun 130022, China*

\*Corresponding author. E-mail: dongfeng@ciac.jl.cn

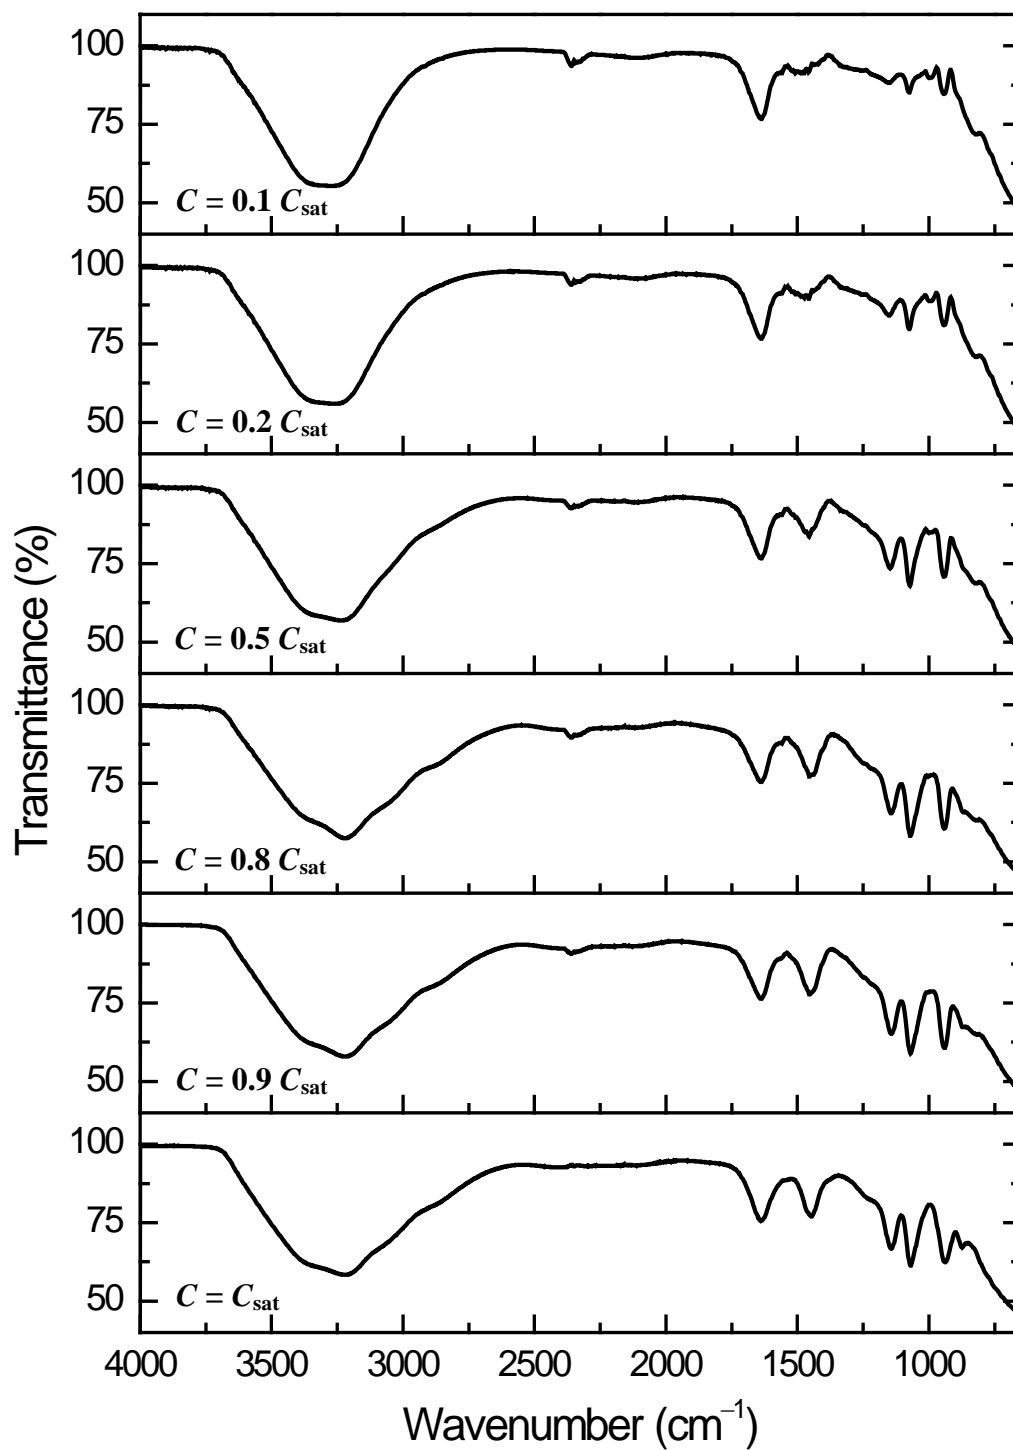

Figure S1 Concentration dependent ATR-IR spectra of ADP solution.

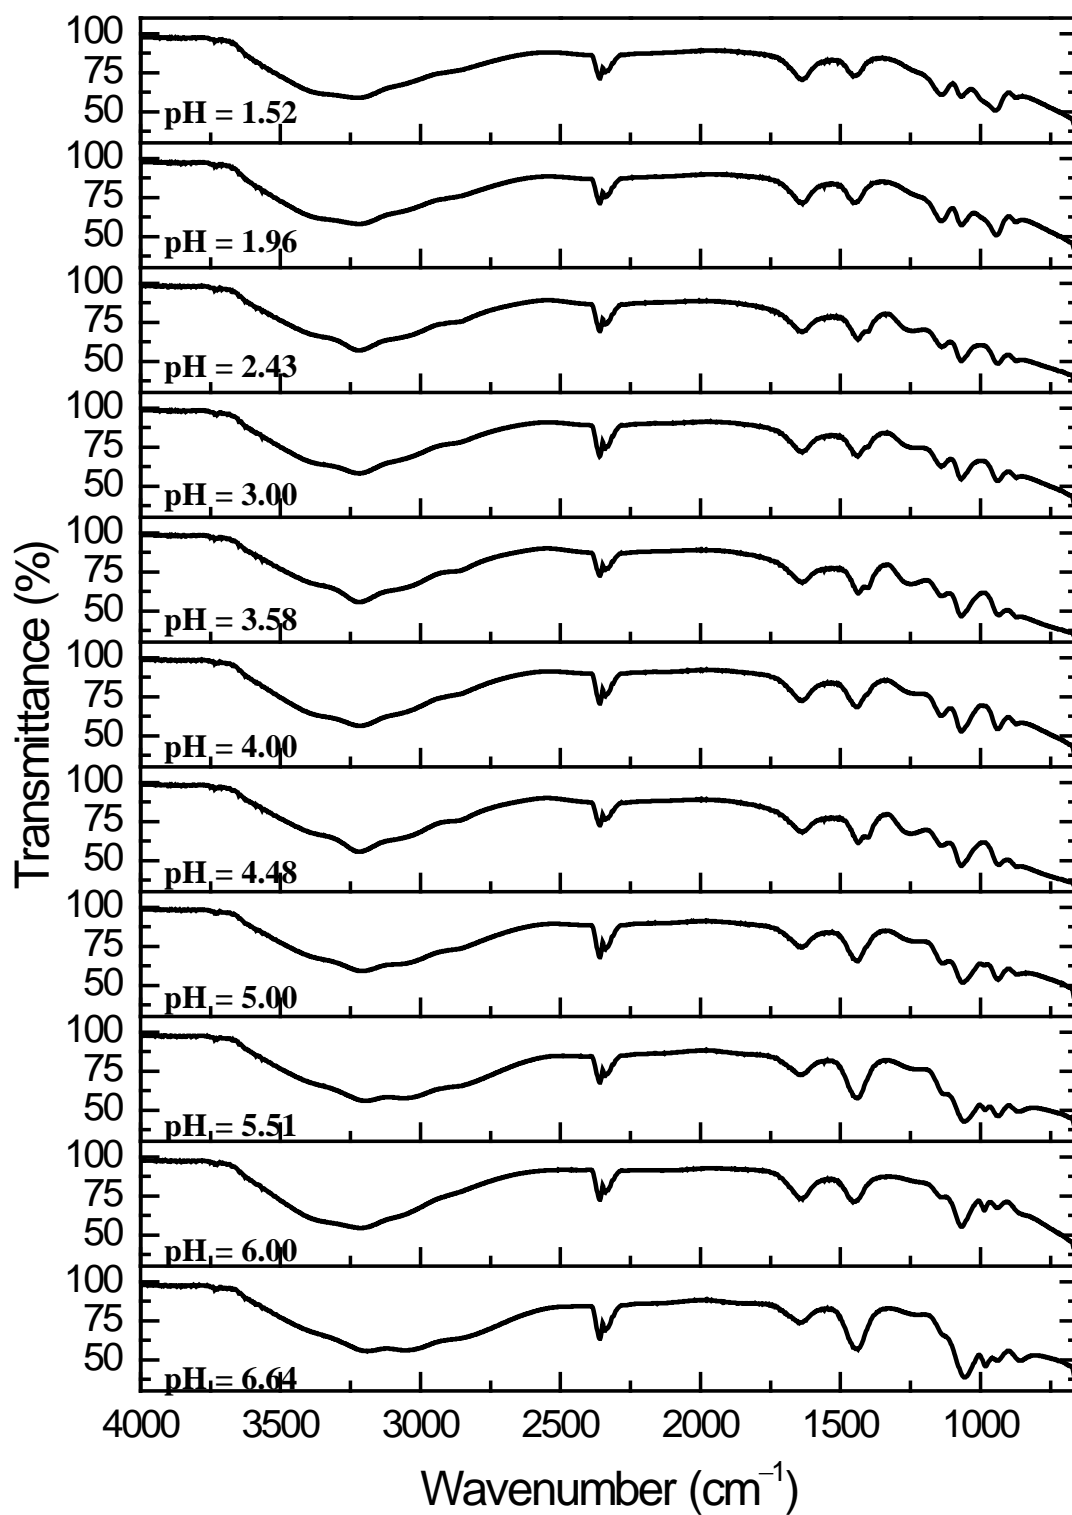

Figure S2 pH dependent ATR-IR spectra of supersaturated ADP solution.

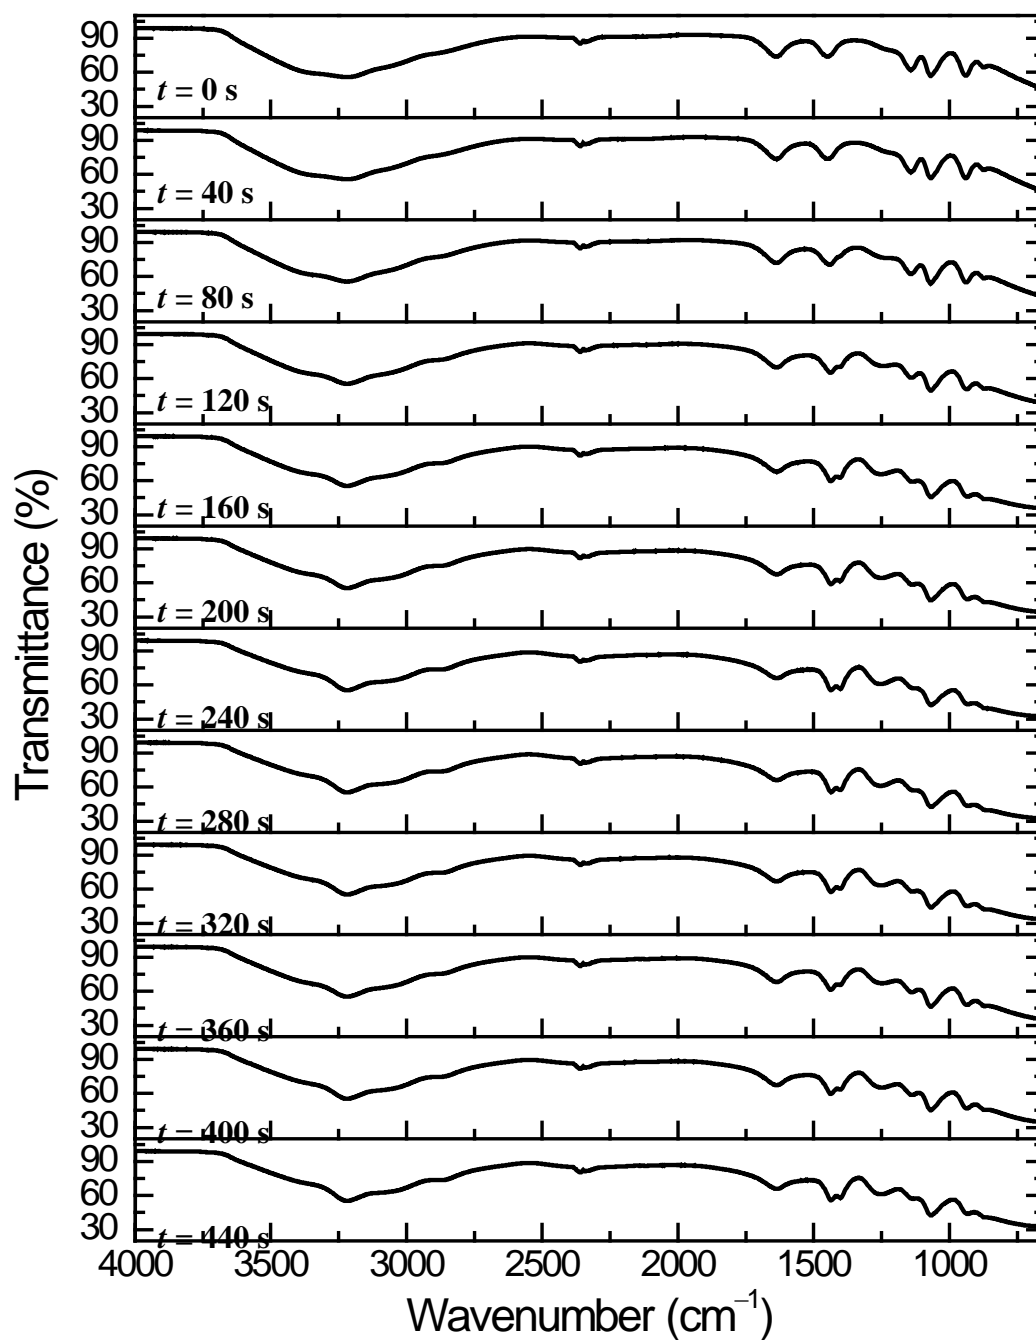

Figure S3 Time dependent ATR-IR spectra of ADP supersaturated solution.

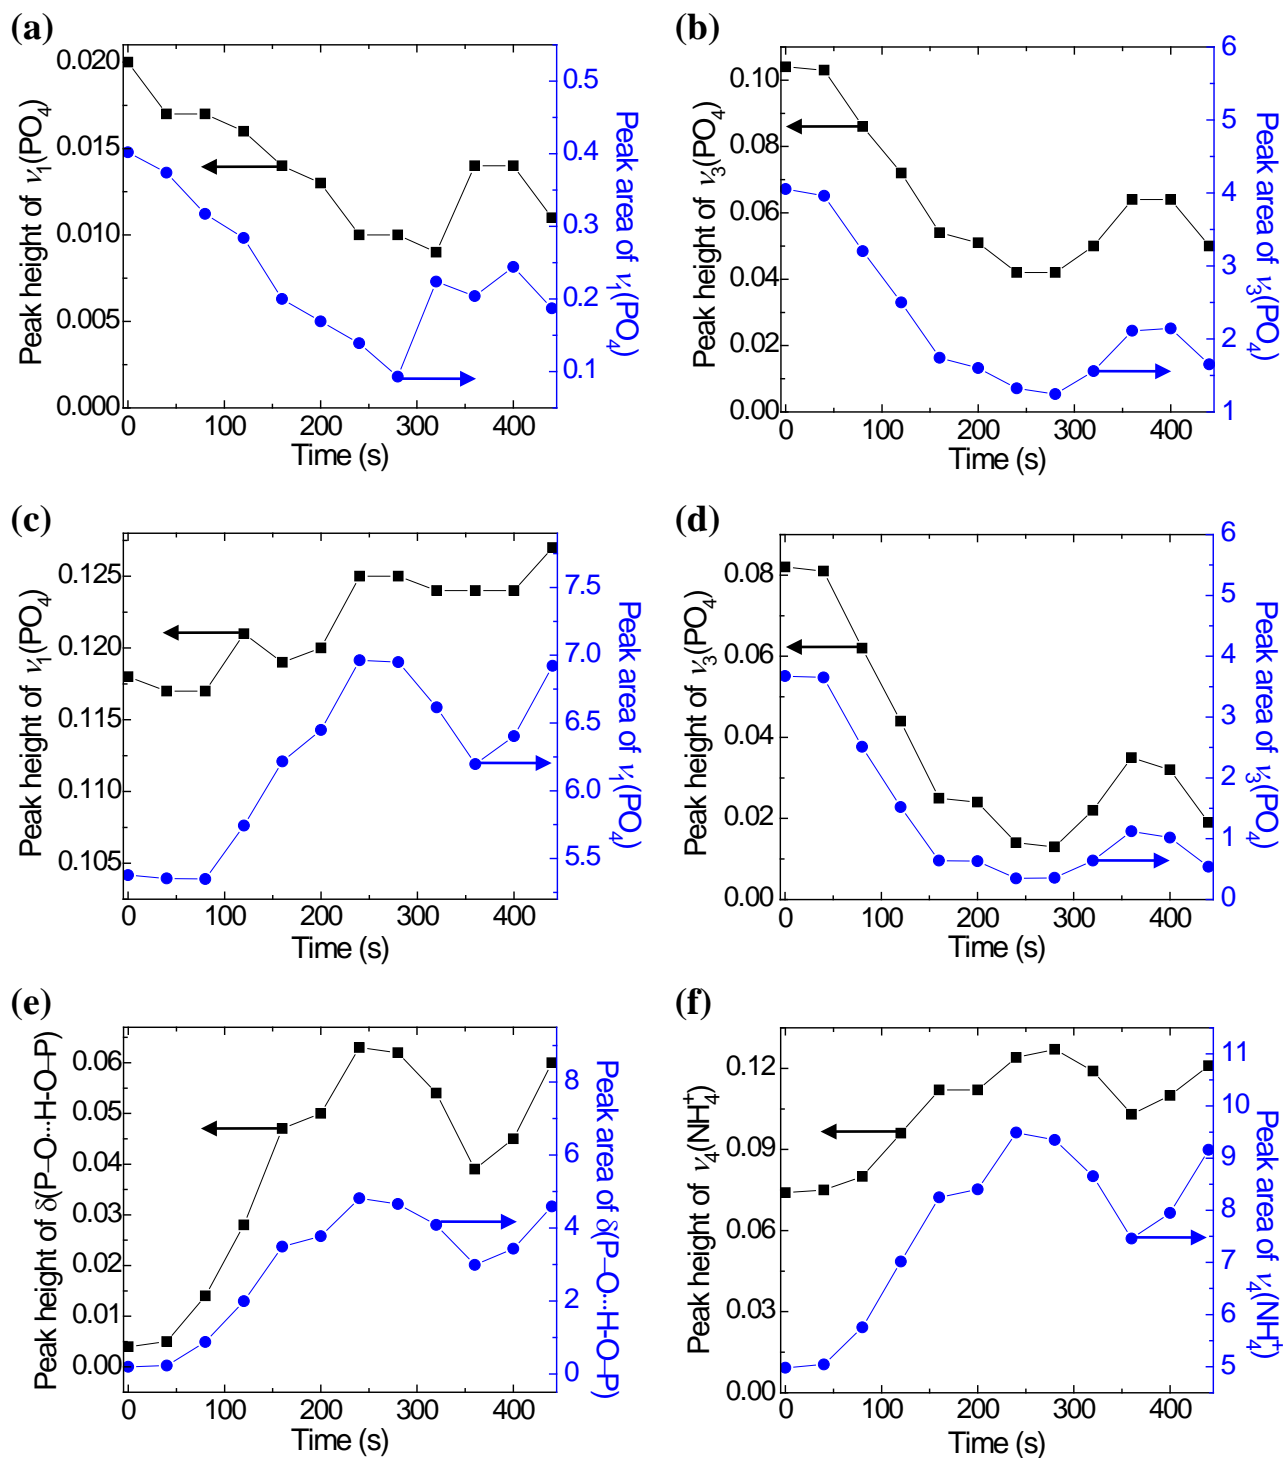

Figure S4. Time dependent peak height and peak area of vibrations of P–O (a,b), P–OH (c,d), P–O $\cdots$ H–O–P (e), and NH $_4^+$  (f) in ATR-IR spectra.

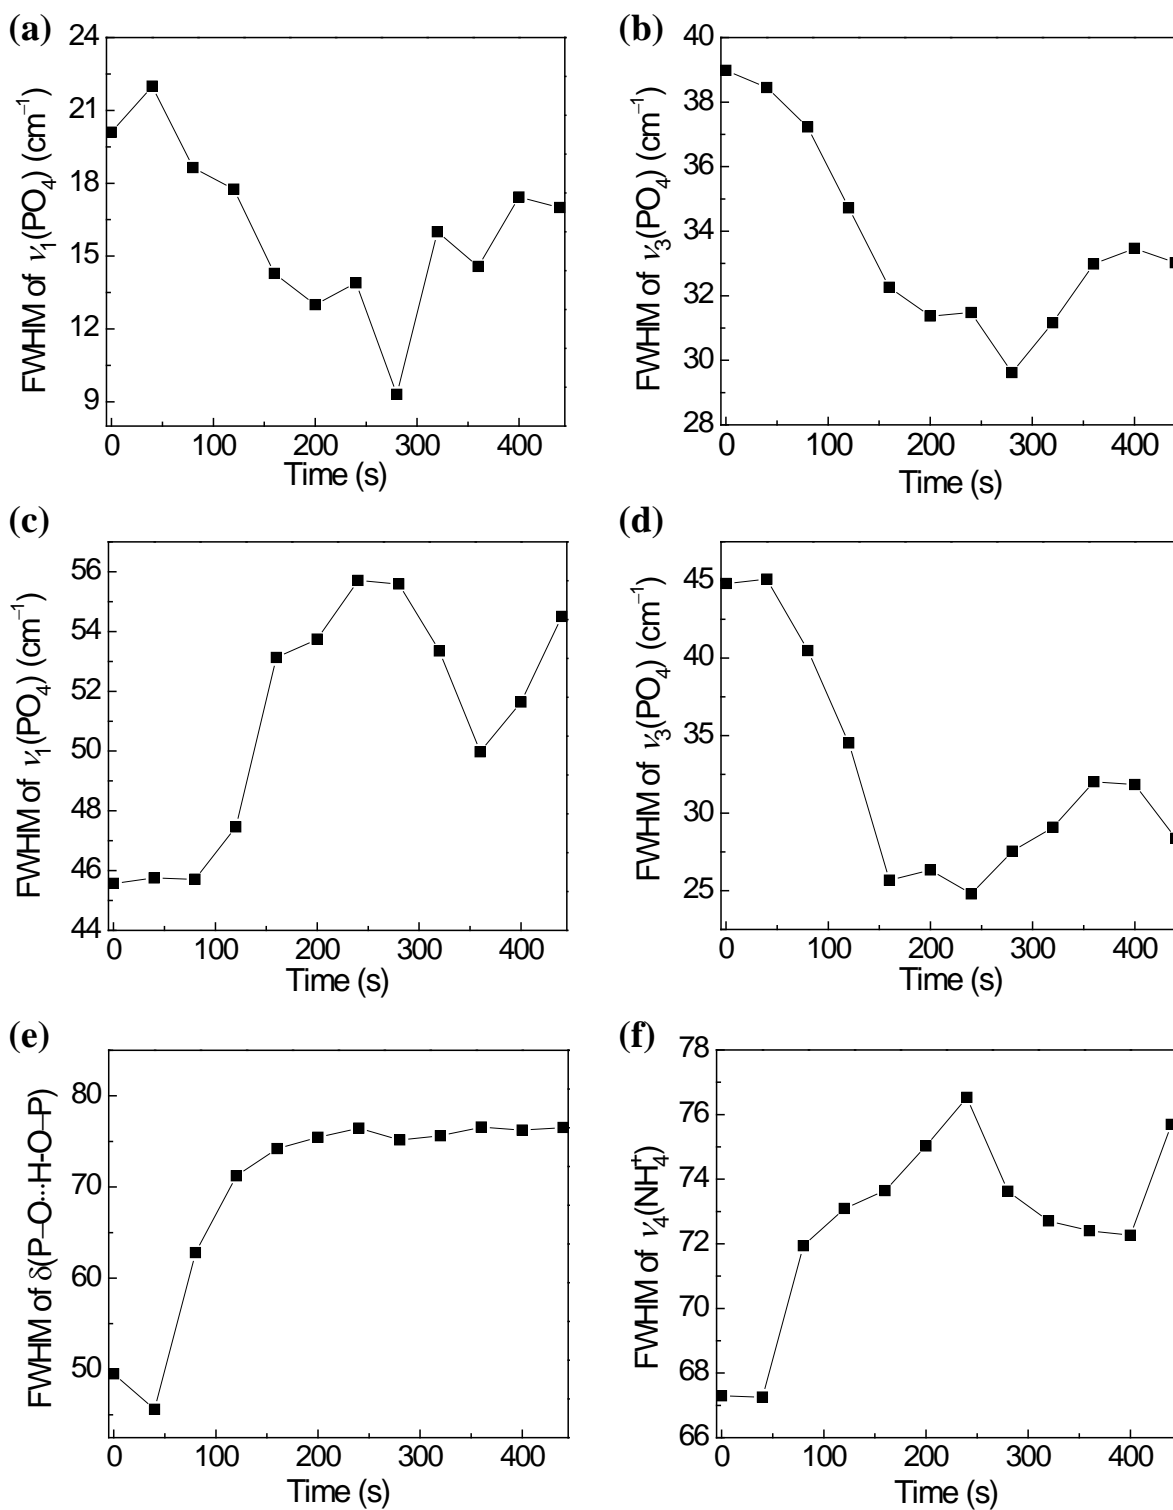

Figure S5. Time dependent FWHM of vibrations of P-O (a,b), P-OH (c,d), P-O...H-O-P (e), and NH<sub>4</sub><sup>+</sup> (f) in ATR-IR spectra.

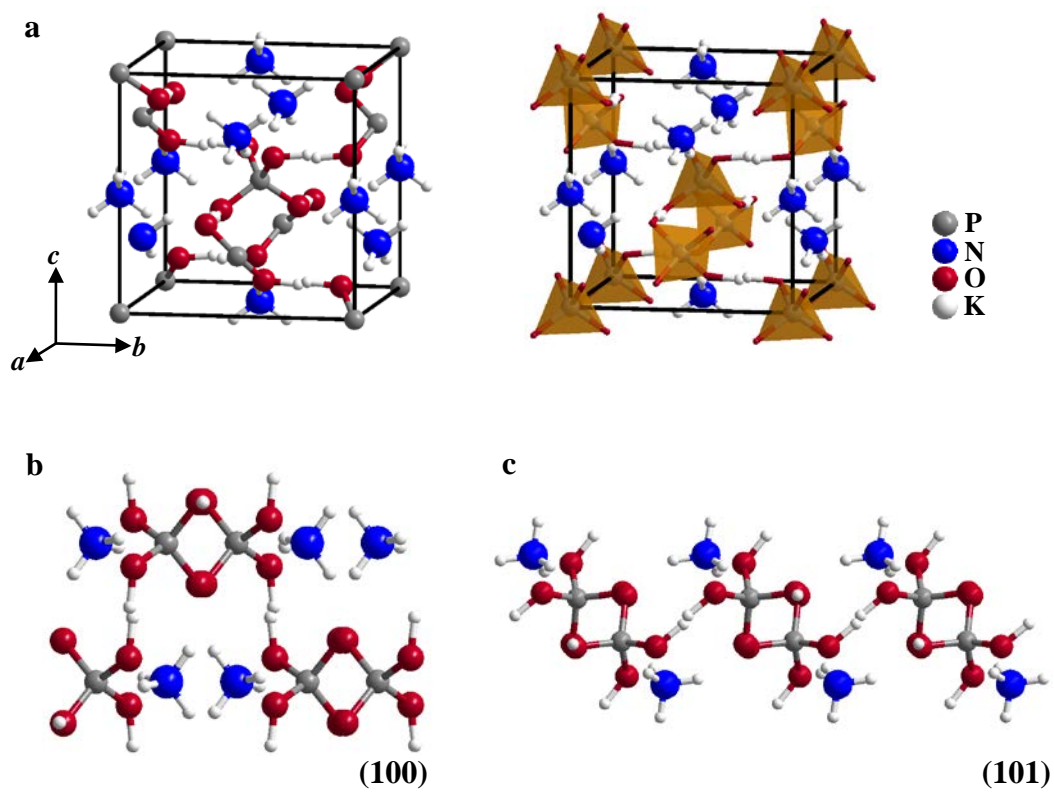

Figure S6 Structural characteristics of ADP. (a) Unit cell of ADP. (b) Structural characteristics of  $\{100\}$  plane. (c) Structural characteristics of  $\{101\}$  plane.

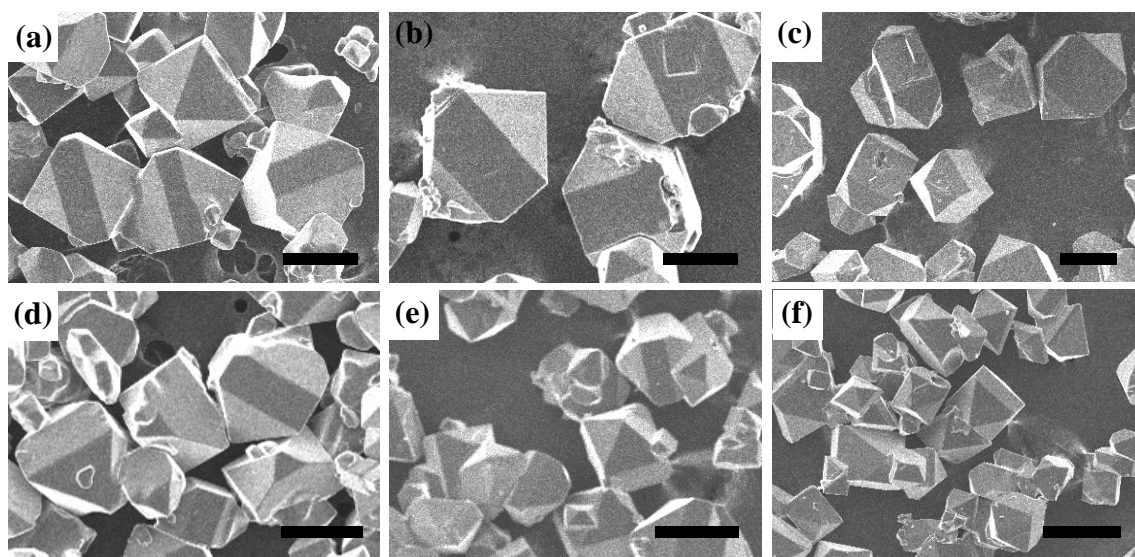

Figure S7 Morphology evolution of ADP crystallites in aqueous solutions with different pH values, from (a) to (f), the corresponding pH values are 1.64, 3.30, 3.83, 4.24, 4.68 and 5.65, Scale bar = 200 μm.



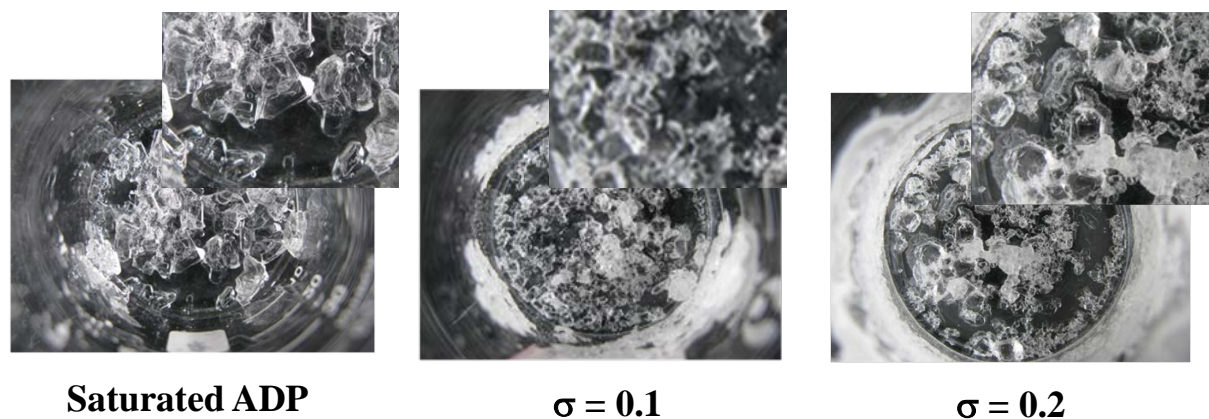

Figure S8 Morphology evolution of ADP crystals grown under different supersaturations. The samples were prepared by naturally evaporating ADP solution at room temperature.

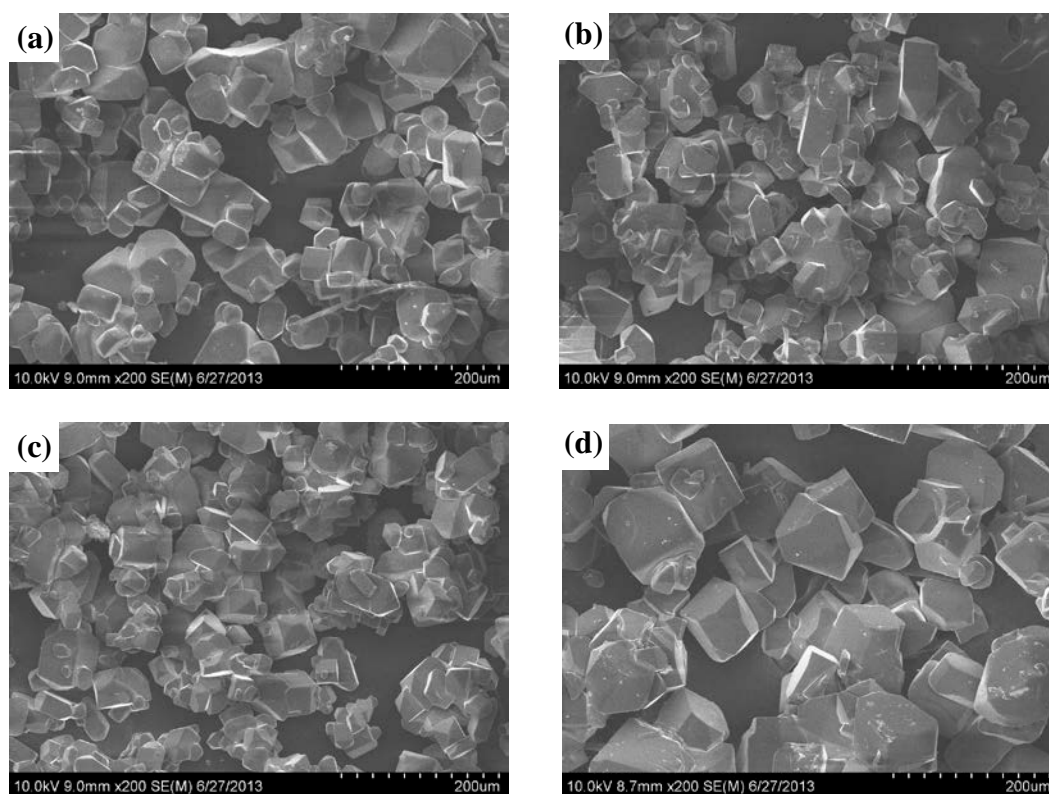

Figure S9 Morphology evolution of ADP crystallites in aqueous solutions with different supersaturations, from (a) to (d), the corresponding supersaturation degrees are 0.05, 0.10, 0.20, 0.30, respectively. Scale bar = 200  $\mu\text{m}$ . ADP of analytical grade and deionized water are used in the present experiments, which are carried out at ambient temperature 26  $^{\circ}\text{C}$ . The supersaturated ADP solutions of 40  $^{\circ}\text{C}$  are prepared, respectively. After the temperature of the solutions is decreased to ambient, ADP solution of  $\sim 10$  ml was filtrated and transferred into a 50 ml glass beaker with agitating by magnetic stirrer and evaporates at ambient temperature, lots of ADP crystallites are grown spontaneously.
